# Supplementary material
Source: MDPI journal article supplement (https://www.mdpi.com/2075-5309/8/8/105)
Supplement: s1 [file s1]

## Supporting Information

# Strategies to Improve the Energy Performance of Buildings: A Review of Their Life Cycle Impact

Nadia MIRABELLA <sup>1</sup>, Martin RÖCK <sup>2</sup>, Marcella Ruschi Mendes SAADE <sup>3</sup>, Carolin SPIRINCKX <sup>4</sup>, Marc BOSMANS <sup>5</sup>, Karen ALLACKER <sup>1</sup> and Alexander PASSER <sup>2,\*</sup>

<sup>1</sup> Faculty of Engineering Science, Department of Architecture, KU Leuven, Kasteelpark Arenberg 1 Box 2431, 3001 Leuven, Belgium; nadia.mirabella@kuleuven.be (N.M.); karen.allacker@kuleuven.be (K.A.)

<sup>2</sup> Working Group Sustainable Construction, Institute of Technology and Testing of Construction Materials, Graz University of Technology, Waagner-Biro-Straße 100/XI, 8020 Graz, Austria; martin.roeck@tugraz.at

<sup>3</sup> Department of Architecture and Construction, School of Civil Engineering, Architecture and Urbanism, University of Campinas, Albert Einstein Avenue, 951, 13083-852 Campinas, Brazil; marcellarms@hotmail.com

<sup>4</sup> Unit Smart Energy and Built Environment, VITO NV|Boeretang 200, 2400 Mol, Belgium; carolin.spirinckx@vito.be

<sup>5</sup> Sustainable Construction Manager, European Insulation Manufacturers Association (EURIMA); marc.bosmans@eurima.org

\* Correspondence: alexander.passer@tugraz.at

## S1. METHODOLOGY

After selecting the final sample of papers, the project team developed a matrix (see separate Excel file dating from 31 July 2017) in which the main findings from the different literature studies could be summarised. It resembles a data extraction form, containing all information perceived relevant, in an attempt to provide a combined quantitative and qualitative analysis of the scientific state-of-the-art. The different literature studies are presented in a matrix table indicating:

- Which research questions are answered by the document;
- File name;
- Title of the document;
- The authors;
- Solution category for energy efficiency improvements:
  - insulation and improvement of the envelope;
  - replacement of the equipment;
  - on-site installations for renewable energy;
  - automation of the building;
  - etc.
- Short description of the solution presented in the document;
- Source of or link to the document;
- Name of journal/paper;
- Country covered within the document;
- Publication year of the document;
- Building typology covered by the document;
- Whether it covers new build or refurbishment case(s);
- Typology of the energy performance;
- System boundaries of the LCA;
- Important assumptions in the study (e.g. allocation);
- Additional comments related to the LCA modelling;
- Database used for the LCA modelling;
- Reference study period;

- Whether it is a qualitative or quantitative study;
- Additional comments on the document;
- Construction method of the covered case(s);
- Thermal insulation material used;
- Which parts of the building was included in the LCA;
- Applied assessment methodology;
- LCA software used;
- Indicators assessed;
- Gross floor area [m<sup>2</sup>];
- Net floor area [m<sup>2</sup>];
- Reference area for EE/EC [m<sup>2</sup>];
- Final operational energy demand [kWh/m<sup>2</sup>a];
- Final energy demand for electricity [kWh/m<sup>2</sup>a];
- Final energy demand for heating and hot water [kWh/m<sup>2</sup>a];
- Final energy demand for cooling [kWh/m<sup>2</sup>a];
- Climate change impacts for each stage of the building's life cycle, according to EN 15978 (from Modules A to D);
- Primary energy (non-renewable) consumption for each stage of the building's life cycle, according to EN 15978 (from Modules A to D);
- Abiotic Depletion Potential impacts for each stage of the building's life cycle, according to EN 15978 (from Modules A to D);
- Hazardous waste generation for each stage of the building's life cycle, according to EN 15978 (from Modules A to D);
- Single environmental score for each stage of the building's life cycle, according to EN 15978 (from Modules A to D);
- Fifteen columns show results calculated by the embedded formulae within the matrix, to portray each life cycle stage contribution to the assessed building's total load;
- Fifteen columns regarding the ratio of impacts caused by insulation and one column regarding the tipping point of insulation, followed the same number and type of columns but for renewable energy installations;
- And, finally, last ten columns include information regarding the financial cost.

## S2. RESULTS

### S2.1 GENERAL OVERVIEW, META- ANALYSIS

#### ***Number of papers reviewed***

- 59 papers;
- 5 different scientific journals;
- 16 "others" = 1 EPD, 1 magazine article, 2 conference proceedings, 1 PhD thesis. 3 research reports, and 7 case studies.

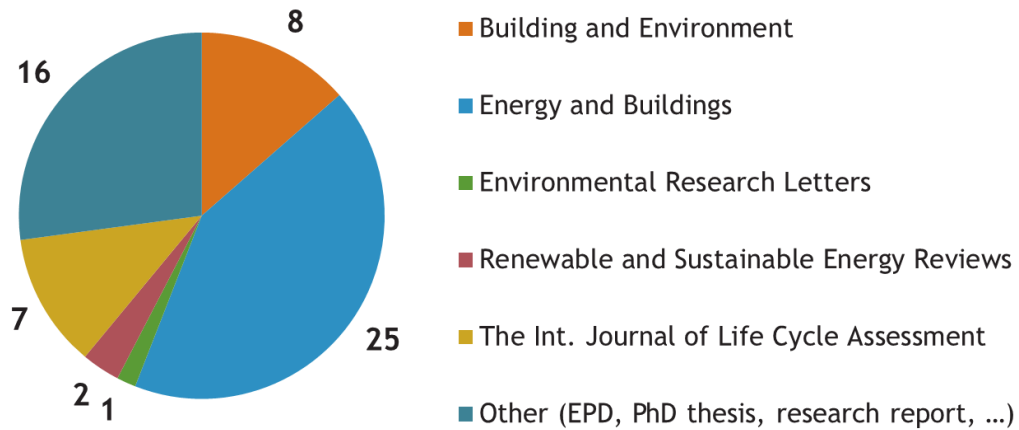

Figure S1: Number and types of papers reviewed

- The 178 case studies covered 18 different countries:

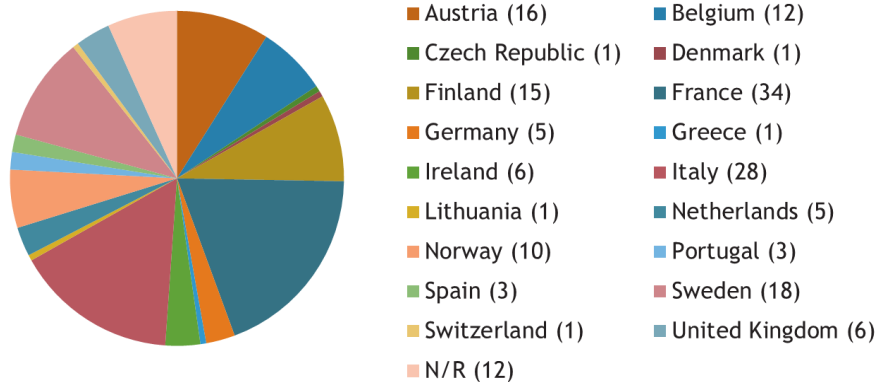

Figure S2: Number of countries covered by the case studies.

(N/R = not relevant/ review paper/ multiple countries)

- The energy performance level was given from 135 out of 178 case studies, and those 135 cases covered 7 types of energy performance level:

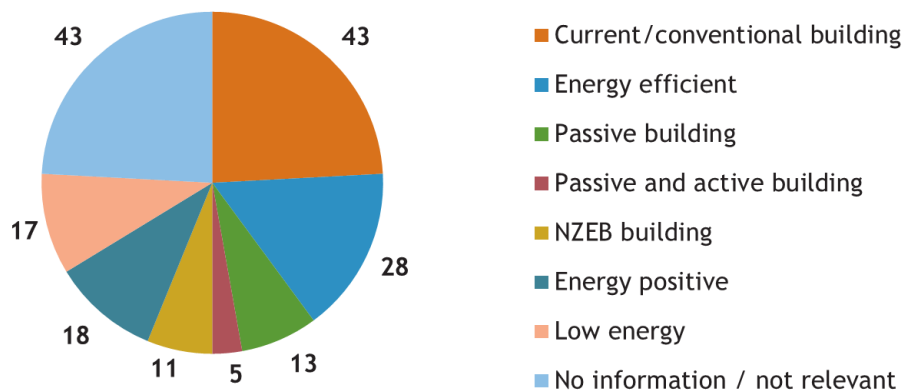

Figure S3: Types of energy performance levels covered by the case studies

- The 178 case studies covered 111 new built cases and 41 refurbishment cases:

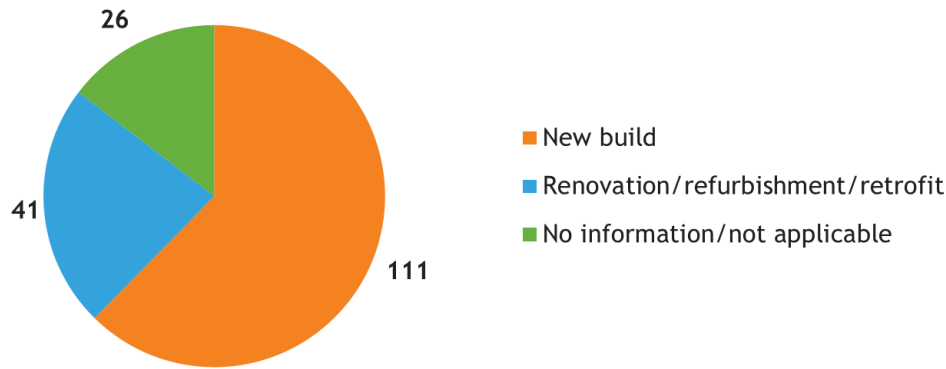

Figure S4: Division of new built – renovation case studies

- 172 out of 178 case studies covered 6 different system boundaries:

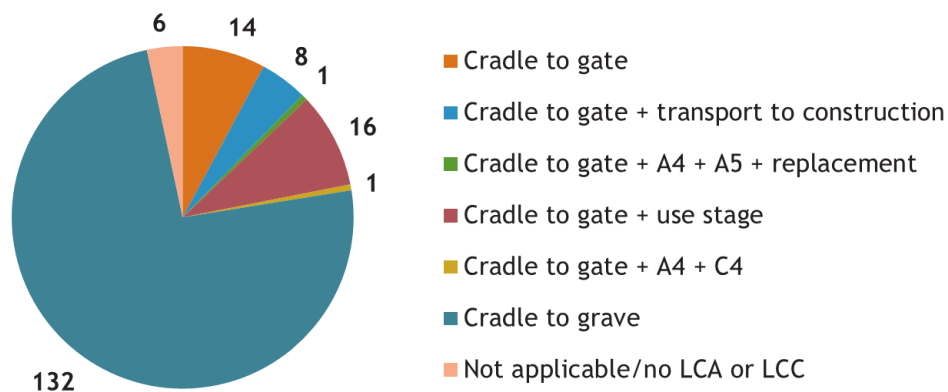

Figure S5: Types of system boundaries covered by the case studies

## S2.2 RESEARCH QUESTION 1 – RQ1

The presented ratios are results calculated with the matrix based on absolute figures taken from the papers or visually extrapolated from graphs within the papers. The project team divided the impact with a 95%-5% division for the cases where figures were given for the complete module A (i.e. production stage including construction stage, thus attributing 95% to the production stage and 5% to the construction stage). For a complete overview, e.g. for other impact categories or incomplete figures of other cases, please refer to the matrix.

Table S1: Life cycle impact assessment of three stone wool insulation thicknesses: 40, 80 and 120 mm (functional unit of 1 m<sup>2</sup> of living area over a period of 50 years) [22]

|                    | No insulation                                     |        | RW40   |        | RW80   |       | RW120  |        | No insulation                   |       | RW40  |       | RW80  |       | RW120 |       |
|--------------------|---------------------------------------------------|--------|--------|--------|--------|-------|--------|--------|---------------------------------|-------|-------|-------|-------|-------|-------|-------|
|                    | Climate change (kg CO <sub>2</sub> eq)            |        |        |        |        |       |        |        | Primary energy (MJ)             |       |       |       |       |       |       |       |
| Removal            | 4.3                                               | (2%)   | 4.3    | (2%)   | 4.3    | (2%)  | 4.3    | (2%)   | 33                              | (1%)  | 33    | (1%)  | 33    | (1%)  | 33    | (1%)  |
| Construction       | 50                                                | (21%)  | 59     | (28%)  | 69     | (32%) | 78     | (36%)  | 846                             | (24%) | 1035  | (32%) | 1201  | (37%) | 1357  | (41%) |
| Operational Energy | 160                                               | (69%)  | 130    | (61%)  | 120    | (57%) | 115    | (53%)  | 2277                            | (65%) | 1843  | (57%) | 1705  | (52%) | 1626  | (49%) |
| Maintenance        | 19                                                | (8%)   | 19     | (9%)   | 19     | (9%)  | 19     | (9%)   | 324                             | (9%)  | 324   | (10%) | 324   | (10%) | 324   | (10%) |
| Total              | 233                                               |        | 212    |        | 211    |       | 215    |        | 3479                            |       | 3235  |       | 3263  |       | 3340  |       |
|                    | Terrestrial acidification (kg SO <sub>2</sub> eq) |        |        |        |        |       |        |        | Ozone depletion (mg CFC-11 eq)  |       |       |       |       |       |       |       |
| Removal            | 0.02                                              | (1%)   | 0.02   | (1%)   | 0.02   | (1%)  | 0.02   | (1%)   | 0.3                             | (2%)  | 0.3   | (2%)  | 0.3   | (2%)  | 0.3   | (2%)  |
| Construction       | 0.23                                              | (14%)  | 0.28   | (20%)  | 0.34   | (24%) | 0.39   | (28%)  | 4.9                             | (27%) | 5.7   | (34%) | 6.4   | (38%) | 7.1   | (41%) |
| Operational Energy | 1.29                                              | (79%)  | 1.04   | (73%)  | 0.96   | (68%) | 0.92   | (65%)  | 10.4                            | (58%) | 8.4   | (50%) | 7.8   | (46%) | 7.5   | (43%) |
| Maintenance        | 0.09                                              | (6%)   | 0.09   | (7%)   | 0.09   | (7%)  | 0.09   | (7%)   | 2.4                             | (13%) | 2.4   | (14%) | 2.4   | (14%) | 2.4   | (14%) |
| Total              | 1.6                                               |        | 1.44   |        | 1.41   |       | 1.42   |        | 18.1                            |       | 16.8  |       | 16.9  |       | 17.3  |       |
|                    | Freshwater eutrophication (kg P eq)               |        |        |        |        |       |        |        | Marine eutrophication (kg N eq) |       |       |       |       |       |       |       |
| Removal            | 0.0004                                            | (0.4%) | 0.0004 | (0.5%) | 0.0004 | (1%)  | 0.0004 | (0.5%) | 0.001                           | (3%)  | 0.001 | (3%)  | 0.001 | (3%)  | 0.001 | (3%)  |
| Construction       | 0.014                                             | (16%)  | 0.016  | (22%)  | 0.019  | (26%) | 0.022  | (30%)  | 0.012                           | (23%) | 0.014 | (29%) | 0.017 | (33%) | 0.019 | (37%) |
| Operational Energy | 0.066                                             | (77%)  | 0.053  | (71%)  | 0.049  | (66%) | 0.047  | (63%)  | 0.033                           | (62%) | 0.027 | (54%) | 0.025 | (50%) | 0.024 | (47%) |
| Maintenance        | 0.005                                             | (6%)   | 0.005  | (7%)   | 0.005  | (7%)  | 0.005  | (7%)   | 0.007                           | (12%) | 0.007 | (14%) | 0.007 | (14%) | 0.007 | (13%) |
| Total              | 0.085                                             |        | 0.075  |        | 0.074  |       | 0.075  |        | 0.054                           |       | 0.049 |       | 0.05  |       | 0.05  |       |

## S2.2.1 CURRENT/CONVENTIONAL BUILDINGS

Table S2: Illustrative examples of the weight of each stage of conventional cases.

| Paper                   | Country covered | Building typology                              | New build or refurbishment?          | Reference study period | Construction method                                                                                                                                                                                                                                                                                 | Relative contribution per life cycle stage to the total life cycle impact of the building [%] |                    |           |                   |                  |                    |           |                   |
|-------------------------|-----------------|------------------------------------------------|--------------------------------------|------------------------|-----------------------------------------------------------------------------------------------------------------------------------------------------------------------------------------------------------------------------------------------------------------------------------------------------|-----------------------------------------------------------------------------------------------|--------------------|-----------|-------------------|------------------|--------------------|-----------|-------------------|
|                         |                 |                                                |                                      |                        |                                                                                                                                                                                                                                                                                                     | Climate change                                                                                |                    |           |                   | Primary energy   |                    |           |                   |
|                         |                 |                                                |                                      |                        |                                                                                                                                                                                                                                                                                                     | production stage                                                                              | construction stage | use stage | end-of-life stage | production stage | construction stage | use stage | end-of-life stage |
| Dahlstrom et al., 2012  | Norway          | Residential - single-family or terraced houses | New build                            | 50 years               | Wooden frame house                                                                                                                                                                                                                                                                                  | 19.0                                                                                          | 1.0                | 75.0      | 5.0               | 9.5              | 0.5                | 1.0       | 89.0              |
|                         | Norway          | Residential - single-family or terraced houses | New build                            | 50 years               | Wooden frame house                                                                                                                                                                                                                                                                                  | 20.9                                                                                          | 1.1                | 73.0      | 5.0               | 11.4             | 0.6                | 1.0       | 87.0              |
|                         | Norway          | Residential - single-family or terraced houses | New build                            | 50 years               | Wooden frame house                                                                                                                                                                                                                                                                                  | 21.9                                                                                          | 1.2                | 69.0      | 8.0               | 10.5             | 0.6                | 2.0       | 87.0              |
|                         | Norway          | Residential - single-family or terraced houses | New build                            | 50 years               | Wooden frame house                                                                                                                                                                                                                                                                                  | 23.8                                                                                          | 1.3                | 65.0      | 10.0              | 12.4             | 0.7                | 1.0       | 86.0              |
| Asdrubali et al., 2013  | Italy           | Residential - single-family or terraced houses | New build                            | 50 years               | Brick house built in 2002 with thermal insulation in the space, internal plaster, and external plaster and bricks. Aluminum windows. Insulated roof. Reinforced concrete structure. Longitinal axis of building N-S orientated. Gas-fired heating system.                                           | 83.3                                                                                          | 4.4                | 4.7       | 7.6               | 81.3             | 4.3                | 6.3       | 8.1               |
|                         | Italy           | Residential - multi-apartment buildings        | New build                            | 50 years               | Brick building with 18 flats built in 2008 with thermal insulation in the space, internal plaster, and external plaster and bricks. Aluminum windows. Flat insulated roof. Reinforced concrete structure. Longitinal axis of building E-W orientated. Gas-fired autonomous heating system per flat. | 82.9                                                                                          | 4.4                | 5.6       | 7.1               | 80.7             | 4.2                | 6.9       | 8.2               |
|                         | Italy           | Public - Office buildings                      | New build                            | 50 years               | Brick building built in 2009 with thermal insulation in the space, internal plaster, and external claddings. Large-sized aluminum windows. Flat insulated roof. Reinforced concrete structure. Longitinal axis of building N-S orientated. Air-conditioning system with primary air and fan-coils.  | 77.3                                                                                          | 4.1                | 8.6       | 10.1              | 77.9             | 4.1                | 10.2      | 7.8               |
| Weiler et al., 2017 (*) | Germany         | Residential - multi-apartment buildings        | N/A (No information/ not applicable) | 50 years               | Honey comb bricks and reinforced concrete                                                                                                                                                                                                                                                           | 4.6                                                                                           | 0.2                | 94.0      | 1.1               | 4.9              | 0.3                | 93.9      | 0.9               |

(\*) In the paper by Weiler *et al.* (2017) one building was analysed on three levels of energy performance (i.e. conventional, passive, and low-energy). During the final meeting there were some questions regarding the comparison of the cases by Weiler; therefore Annex A presents some of the additional results by Weiler *et al.*

## S2.2.2 NEARLY ZERO-ENERGY BUILDINGS

Table S3: Illustrative example of the weight of each stage of a NZEB case.

| Paper                | Country covered | Building typology                       | New build or refurbishment? | Reference study period | Construction method                                                                                                                                                                                                                                                                                                                                                                                                                                                                                                      | Climate change   |                    |           |                   | Primary energy   |                    |           |                   |
|----------------------|-----------------|-----------------------------------------|-----------------------------|------------------------|--------------------------------------------------------------------------------------------------------------------------------------------------------------------------------------------------------------------------------------------------------------------------------------------------------------------------------------------------------------------------------------------------------------------------------------------------------------------------------------------------------------------------|------------------|--------------------|-----------|-------------------|------------------|--------------------|-----------|-------------------|
|                      |                 |                                         |                             |                        |                                                                                                                                                                                                                                                                                                                                                                                                                                                                                                                          | production stage | construction stage | use stage | end-of-life stage | production stage | construction stage | use stage | end-of-life stage |
| Paleari et al., 2016 | Italy           | Residential - multi-apartment buildings | New build                   | 100 years              | reinforced concrete load-bearing structures, with lightening brick blocks in the slabs of the residential parts. Perimeter walls of thermal brick blocks with an external insulation in rock wool panels; internal partitions in brick with traditional plaster. Roof structures of glue-laminated wood; pitches insulated through rock wool panels and a multilayer reflective insulation composed of several aluminium sheets alternated with expanded polyethylene layers; finishing pitch surfaces in concrete tiles | 55.7             | 5.8                | 35.6      | 2.9               | 54.7             | 4.0                | 39.1      | 2.2               |

### S2.2.3 PASSIVE HOUSE BUILDINGS

Table S4: Illustrative examples of the weight of each stage of passive house cases.

| Paper                     | Country covered | Building typology                              | New build or refurbishment?           | Reference study period | Construction method                                                                  | Relative contribution per life cycle stage to the total life cycle impact of the building [%] |                    |           |                   |                  |                    |           |                   |
|---------------------------|-----------------|------------------------------------------------|---------------------------------------|------------------------|--------------------------------------------------------------------------------------|-----------------------------------------------------------------------------------------------|--------------------|-----------|-------------------|------------------|--------------------|-----------|-------------------|
|                           |                 |                                                |                                       |                        |                                                                                      | Climate change                                                                                |                    |           |                   | Primary energy   |                    |           |                   |
|                           |                 |                                                |                                       |                        |                                                                                      | production stage                                                                              | construction stage | use stage | end-of-life stage | production stage | construction stage | use stage | end-of-life stage |
| Proietti et al., 2013 (*) | Italy           | Residential - single-family or terraced houses | New build                             | 70 years               | New built passive house<br>Materials: cement, steel, wood, PV HVAC, wood-alu windows | 242.1                                                                                         | 80.7               | -190.9    | -31.9             | 1022.4           | 255.6              | -691.9    | -486.1            |
|                           | Italy           | Residential - single-family or terraced houses | New build                             | 70 years               | New built passive house<br>Materials: cement, steel, wood, PV HVAC, wood-alu windows | 30.0                                                                                          | 10.3               | -23.4     | 83.0              | 102.6            | 27.9               | -39.2     | 8.7               |
|                           | Italy           | Residential - single-family or terraced houses | New build                             | 70 years               | New built passive house<br>Materials: cement, steel, wood, PV HVAC, wood-alu windows | 40.6                                                                                          | 13.9               | 51.0      | -5.5              | 4829.3           | 1310.5             | -3547.3   | -2492.4           |
| Dahlstrom et al., 2012    | Norway          | Residential - single-family or terraced houses | New build                             | 50 years               | Wooden frame house                                                                   | 28.5                                                                                          | 1.5                | 60.0      | 10.0              | 12.4             | 0.7                | 86.0      | 1.0               |
|                           | Norway          | Residential - single-family or terraced houses | New build                             | 50 years               | Wooden frame house                                                                   | 29.5                                                                                          | 1.5                | 57.0      | 12.0              | 13.3             | 0.7                | 85.0      | 1.0               |
|                           | Norway          | Residential - single-family or terraced houses | New build                             | 50 years               | Wooden frame house                                                                   | 31.4                                                                                          | 1.7                | 55.0      | 12.0              | 15.2             | 0.8                | 82.0      | 2.0               |
|                           | Norway          | Residential - single-family or terraced houses | New build                             | 50 years               | Wooden frame house                                                                   | 31.4                                                                                          | 1.7                | 55.0      | 12.0              | 16.2             | 0.8                | 82.0      | 1.0               |
| Weiler et al., 2017 (**)  | Germany         | Residential - multi-apartment buildings        | Renovation / refurbishment / retrofit | 50 years               | Honey comb bricks and reinforced concrete                                            | 13.4                                                                                          | 0.7                | 83.2      | 2.7               | 17.1             | 0.9                | 80.0      | 2.0               |

(\*) The negative values (i.e. benefits) in the use stage is explained by the presentence of a 6 kWp PV system, which produces more energy than the house consumes. The negative values in the end-of-life stage is explained by the assumed recycling/reusing processes. This paper does not apply the methodology of the EN 15804 and therefore includes the net benefits in the different stages instead of declaring them in a separate Module D.

(\*\*) In the paper by Weiler *et al.* (2017) one building was analysed on three levels of energy performance (i.e. conventional, passive, and low-energy). During the final meeting there were some questions regarding the comparison of the cases by Weiler; therefore Annex A presents some of the additional results by Weiler *et al.* .



## S2.2.4 ENERGY POSITIVE BUILDINGS

Table S5: Illustrative examples of the weight of each stage of energy positive cases.

| Paper                       | Country covered | Building typology                              | New build or refurbishment?           | Reference study period  | Construction method | Relative contribution per life cycle stage to the total life cycle impact of the building [%] |                    |           |                   |                  |                    |           |                   |
|-----------------------------|-----------------|------------------------------------------------|---------------------------------------|-------------------------|---------------------|-----------------------------------------------------------------------------------------------|--------------------|-----------|-------------------|------------------|--------------------|-----------|-------------------|
|                             |                 |                                                |                                       |                         |                     | Climate change                                                                                |                    |           |                   | Primary energy   |                    |           |                   |
|                             |                 |                                                |                                       |                         |                     | production stage                                                                              | construction stage | use stage | end-of-life stage | production stage | construction stage | use stage | end-of-life stage |
| Thiers and Peuportier, 2012 | France          | Residential - single-family or terraced houses | New build                             | N/A (built in 2007)     | No information      | 42.6                                                                                          | 2.1                | 34.0      | 21.3              | 89.0             | 4.5                | 4.3       | 2.2               |
|                             | France          | Residential - single-family or terraced houses | New build                             | N/A (built in 2007)     | No information      | 46.5                                                                                          | 2.3                | 27.9      | 23.3              | 87.3             | 4.4                | 6.2       | 2.1               |
|                             | France          | Residential - single-family or terraced houses | New build                             | N/A (built in 2007)     | No information      | 46.5                                                                                          | 2.3                | 27.9      | 23.3              | 79.0             | 4.0                | 15.5      | 1.5               |
|                             | France          | Residential - multi-apartment buildings        | Renovation / refurbishment / retrofit | N/A (renovated in 2001) | No information      | 29.0                                                                                          | 1.4                | 63.8      | 5.8               | 8.9              | 0.4                | 89.5      | 1.1               |
|                             | France          | Residential - multi-apartment buildings        | Renovation / refurbishment / retrofit | N/A (renovated in 2001) | No information      | 32.8                                                                                          | 1.6                | 59.0      | 6.6               | 9.8              | 0.5                | 88.5      | 1.2               |
|                             | France          | Residential - multi-apartment buildings        | Renovation / refurbishment / retrofit | N/A (renovated in 2001) | No information      | 19.8                                                                                          | 1.0                | 75.2      | 4.0               | 11.2             | 0.6                | 86.8      | 1.4               |

## S2.2.5 LOW ENERGY BUILDINGS

Table S6: Illustrative examples of the weight of each stage of low energy cases.

| Paper                     | Country covered | Building typology                              | New build or refurbishment? | Reference study period | Construction method                                                       | Relative contribution per life cycle stage to the total life cycle impact of the building [%] |                    |           |                   |                  |                    |           |                   |
|---------------------------|-----------------|------------------------------------------------|-----------------------------|------------------------|---------------------------------------------------------------------------|-----------------------------------------------------------------------------------------------|--------------------|-----------|-------------------|------------------|--------------------|-----------|-------------------|
|                           |                 |                                                |                             |                        |                                                                           | Climate change                                                                                |                    |           |                   | Primary energy   |                    |           |                   |
|                           |                 |                                                |                             |                        |                                                                           | production stage                                                                              | construction stage | use stage | end-of-life stage | production stage | construction stage | use stage | end-of-life stage |
| Blengini & Di Carlo, 2010 | Italy           | Residential - single-family or terraced houses | New build                   | N/A                    | Designed according to sustainable and bioclimatic architecture principles | 56.5                                                                                          | 3.0                | 45.9      | -5.4              | 51.4             | 2.7                | 35.1      | 10.8              |
| Weiler et al., 2017 (*)   | Germany         | Residential - multi-apartment buildings        | New build                   | 50 years               | Reinforced concrete frame                                                 | 11.9                                                                                          | 0.6                | 85.1      | 2.4               | 11.9             | 0.6                | 85.5      | 2.0               |

(\*) In the paper by Weiler *et al.* (2017) one building was analysed on three levels of energy performance (i.e. conventional, passive, and low-energy). During the final meeting there were some questions regarding the comparison of the cases by Weiler; therefore Annex A presents some of the additional results by Weiler *et al.* .

### S3 ADDITIONAL STUDIES REVIEWED

51. Allacker, K.; De Nocker, L. An Approach for Calculating the Environmental External Costs of the Belgian Building Sector. *J. Ind. Ecol.* **2012**, *16*, 710–721.
52. Alshamrani, O.S.; Galal, K.; Alkass, S. Integrated LCA-LEED sustainability assessment model for structure and envelope systems of school buildings. *Build. Environ.* **2014**, *80*, 61–70.
53. Anastaselos, D.; Oxizidis, S.; Papadopoulos, A.M. Energy environmental and economic optimization of thermal insulation solutions by means of an integrated decision support system. *Energy Build.* **2011**, *43*, 686–694.
54. Anink, D. W/E rapport Onderzoek ‘Bepaling kwaliteitsniveaus milieuprestatie van woonfuncties’. 2014. Retrieved from: <https://www.rijksoverheid.nl/documenten/rapporten/2016/07/01/bepaling-kwaliteitsniveaus-milieuprestatie-van-woonfuncties>
55. Antipova, E.; Boer, D.; Guillén-Gosálbez, G.; Cabeza, L.F.; Jiménez, L. Multi-objective optimization coupled with life cycle assessment for retrofitting buildings. *Energy Build.* **2014**, *82*, 92–99.
56. Ardente, F.; Beccali, M.; Cellura, M.; Mistretta, M. Building energy performance: A LCA case study of kenaf-fibres insulation board. *Energy Build.* **2008**, *40*, 1–10.
57. Asdrubali, F.; Pisello, A.L.; D’Alessandro, F.; Bianchi, F.; Fabiani, C.; Cornicchia, M.; Rotili, A. Experimental and numerical characterization of innovative cardboard based panels: Thermal and acoustic performance analysis and life cycle assessment. *Build. Environ.* **2016**, *95*, 145–159.
58. Azari, R.; Garshasbi, S.; Amini, P.; Rashed-Ali, H.; Mohammadi, Y. Multi-objective optimization of building envelope design for life cycle environmental performance. *Energy Build.* **2016**, *126*, 524–534.
59. Barrau, J.; Ibañez, M.; Badia, F. Impact of the optimization criteria on the determination of the insulation thickness. *Energy Build.* **2014**, *76*, 459–469.
60. Batouli, S.M.; Zhu, Y.; Nar, M.; D’Souza, N.A. Environmental performance of kenaf-fiber reinforced polyurethane: A life cycle assessment approach. *J. Clean. Prod.* **2014**, *66*, 164–173.
61. Beucker, S.; Bergesen, J.D.; Gibon, T. Building Energy Management Systems: Global Potentials and Environmental Implications of Deployment. *J. Ind. Ecol.* **2016**, *20*, 223–233.
62. Biswas, K.; Shrestha, S.S.; Bhandari, M.S.; Desjarlais, A.O. Insulation materials for commercial buildings in North America: An assessment of lifetime energy and environmental impacts. *Energy Build.* **2016**, *112*, 256–269.
63. Carreras, J.; Boer, D.; Guillén-Gosálbez, G.; Cabeza, L.F.; Medrano, M.; Jiménez, L. Multi-objective optimization of thermal modelled cubicles considering the total cost and life cycle environmental impact. *Energy Build.* **2015**, *88*, 335–346.
64. Centre for Energy, Construction, Architecture and the Environment GmbH, Hamburg, Germany. 2016. doi:10.5445/IR/1000051699. Available online: <http://www.lowtemp.eu/partners/centre-energy-construction-architecture-environment/> (accessed on 4 August 2018).
65. Cetiner, I.; Ceylan, N. Environmental consequences of rehabilitation of residential buildings in Turkey: A case study of Istanbul. *Build. Environ.* **2013**, *69*, 149–159.
66. Dahlstrøm, O.; Sørnes, K.; Eriksen, S.T.; Hertwich, E.G. Life cycle assessment of a single-family residence built to either conventional- or passive house standard. *Energy Build.* **2012**, *54*, 470–479.
67. De Meester, B.; Dewulf, J.; Verbeke, S.; Janssens, A.; Van Langenhove, H. Exergetic life-cycle assessment (ELCA) for resource consumption evaluation in the built environment. *Build. Environ.* **2009**, *44*, 11–17.
68. Demertzi, M.; Sierra-Pérez, J.; Paulo, J.A.; Arroja, L.; Dias, A.C. Environmental performance of expanded cork slab and granules through life cycle assessment. *J. Clean. Prod.* **2017**, *145*, 294–302.
69. Densley Tingley, D.; Hathway, A.; Davison, B. An environmental impact comparison of external wall insulation types. *Build. Environ.* **2015**, *85*, 182–189.
70. Desideri, U.; Proietti, S.; Zepparelli, F.; Sdringola, P.; Bini, S. Life Cycle Assessment of a ground-mounted 1778kWp photovoltaic plant and comparison with traditional energy production systems. *Appl. Energy* **2012**, *97*, 930–943.
71. Dylewski, R.; Adamczyk, J. Economic and ecological indicators for thermal insulating building investments. *Energy Build.* **2012**, *54*, 88–95.
72. Dylewski, R.; Adamczyk, J. Study on ecological cost-effectiveness for the thermal insulation of building external vertical walls in Poland. *J. Clean. Prod.* **2016**, *133*, 467–478.

73. Dylewski, R.; Adamczyk, J. The environmental impacts of thermal insulation of buildings including the categories of damage: A Polish case study. *J. Clean. Prod.* **2016**, *137*, 878–887.
74. Ecobilan. Recherche de Paramètres Influençant la Qualité Environnementale des Bâtiments à Basse Consommation Énergétique—Comparaison des Impacts Environnementaux. 2009. Available online: <https://www.infociments.fr/sites/default/files/article/fichier/CT-B57.pdf> (accessed on 4 August 2018).
75. El Hanandeh, A. Environmental assessment of popular single-family house construction alternatives in Jordan. *Build. Environ.* **2015**, *92*, 192–199.
76. Famuyibo, A.A.; Duffy, A.; Strachan, P. Achieving a holistic view of the life cycle performance of existing dwellings. *Build. Environ.* **2013**, *70*, 90–101.
77. Folkhem. Environmental Product Declarations. *Folk. Concept Build.* **2015**, *4*, 1–10.
78. Frischknecht, R.; Stucki, M. Scope-dependent modelling of electricity supply in life cycle assessments. *Int. J. Life Cycle Assess.* **2010**, *15*, 806–816.
79. Gaidajis, G.; Angelakoglou, K. Screening life cycle assessment of an office used for academic purposes. *J. Clean. Prod.* **2011**, *19*, 1639–1646.
80. Garrido, R.; Silvestre, J.D.; Flores-Colen, I. Economic and Energy Life Cycle Assessment of aerogel-based thermal renders. *J. Clean. Prod.* **2017**, *151*, 537–545.
81. Ghose, A.; McLaren, S.J.; Dowdell, D.; Phipps, R. Environmental assessment of deep energy refurbishment for energy efficiency-case study of an office building in New Zealand. *Build. Environ.* **2017**, *117*, 274–287.
82. Gibon, T.; Hertwich, E.G.; Arvesen, A.; Singh, B.; Veronesi, F. Health benefits, ecological threats of low-carbon electricity. *Environ. Res. Lett.* **2017**, *12*, 034023, doi:10.1088/1748-9326/aa6047.
83. Häfliger, I.F.; John, V.; Passer, A.; Lasvaux, S.; Mendes Saade, M.R.; Habert, G. Buildings environmental impacts' sensitivity related to LCA modelling choices of construction materials. *J. Clean. Prod.* **2017**, *156*, 805–816.
84. Heeren, N.; Mutel, C.L.; Steubing, B.; Ostermeyer, Y.; Wallbaum, H.; Hellweg, S. Environmental Impact of Buildings—What Matters? *Environ. Sci. Technol. Lett.* **2015**, *49*, 9832–9841, doi:10.1021/acs.est.5b01735.
85. Hoxha, E.; Jusselme, T. On the necessity of improving the environmental impacts of furniture and appliances in net-zero energy buildings. *Sci. Total Environ.* **2017**, *597*, 405–416.
86. Hoxha, E.; Habert, G.; Lasvaux, S.; Chevalier, J.; Le Roy, R. Influence of construction material uncertainties on residential building LCA reliability. *J. Clean. Prod.* **2017**, *144*, 33–47.
87. Huang, B.; Mauerhofer, V. Life cycle sustainability assessment of ground source heat pump in Shanghai, China. *J. Clean. Prod.* **2016**, *119*, 207–214.
88. Inman, M.R.; Houlihan Wiberg, A. Life Cycle GHG Emissions of Material Use in the Living Laboratory. ZEB Project Report No 24. 2015. Available online: <https://brage.bibsys.no/xmlui/bitstream/handle/11250/2400045/ZEB%20pr%20report%20no24.pdf?sequence=1> (accessed on 4 August 2018).
89. Intini, F.; Kühtz, S. Recycling in buildings: An LCA case study of a thermal insulation panel made of polyester fiber, recycled from post-consumer PET bottles. *Int. J. Life Cycle Assess.* **2011**, *16*, 306–315.
90. Islam, H.; Jollands, M.; Setunge, S.; Ahmed, I.; Haque, N. Life cycle assessment and life cycle cost implications of wall assemblages designs. *Energy Build.* **2014**, *84*, 33–45.
91. Jorge, R.S.; Hertwich, E.G. Grid infrastructure for renewable power in Europe: The environmental cost. *Energy* **2014**, *69*, 760–768.
92. Kim, K.-H. A comparative life cycle assessment of a transparent composite façade system and a glass curtain wall system. *Energy Build.* **2011**, *43*, 3436–3445.
93. Kneifel, J. Life-cycle carbon and cost analysis of energy efficiency measures in new commercial buildings. *Energy Build.* **2010**, *42*, 333–340.
94. Koroneos, C.; Tsarouhis, M. Exergy analysis and life cycle assessment of solar heating and cooling systems in the building environment. *J. Clean. Prod.* **2012**, *32*, 52–60.
95. Lasvaux, S.; Lebert, A.; Achim, F.; Grannec, F.; Hoxha, E.; Nibel, S.; Schiopu, N.; Chevalier, J. Towards guidance values for the environmental performance of buildings: Application to the statistical analysis of 40 low-energy single family houses' LCA in France. *Int. J. Life Cycle Assess.* **2017**, *22*, 657–674.
96. Levels-Vermeer, J.; van Oorschot-Slaat, E. Milieuprestatie Gebouwen: Bruikbaar, Robuust en Onderscheidend? 2016. Available online:

<https://www.lbpsight.nl/storage/app/uploads/public/589/b36/9e8/589b369e8618e517086188.pdf> (accessed on 4 August 2018).

97. Lewandowska, A.; Noskowiak, A.; Pajchrowski, G.; Zarebska, J. Between full LCA and energy certification methodology—A comparison of six methodological variants of buildings environmental assessment. *Int. J. Life Cycle Assess.* **2015**, *20*, 9–22.
98. Mangan, S.D.; Oral, G.K. Assessment of residential building performances for the different climate zones of Turkey in terms of life cycle energy and cost efficiency. *Energy Build.* **2016**, *110*, 362–376.
99. Martínez, E.; Nuñez, Y.; Sobaberas, E. End of life of buildings: Three alternatives, two scenarios. A case study. *Int. J. Life Cycle Assess.* **2013**, *18*, 1082–1088.
100. Mazor, M.H.; Mutton, J.D.; Russell, D.A.M.; Keoleian, G.A. Life Cycle Greenhouse Gas Emissions Reduction From Rigid Thermal Insulation Use in Buildings. *J. Ind. Ecol.* **2011**, *15*, 284–299.
101. Mequignon, M.; Ait Haddou, H.; Thellier, F.; Bonhomme, M. Greenhouse gases and building lifetimes. *Build. Environ.* **2013**, *68*, 77–86.
102. Motuziene, V.; Rogoža, A.; Lapinskiene, V.; Vilutiene, T. Construction solutions for energy efficient single-family house based on its life cycle multi-criteria analysis: A case study. *J. Clean. Prod.* **2016**, *112*, 532–541.
103. Ng, P.K.; Mithraratne, N. Lifetime performance of semi-transparent building-integrated photovoltaic (BIPV) glazing systems in the tropics. *Renew. Sustain. Energy Rev.* **2014**, *31*, 736–745.
104. Nicolae, B.; George-Vlad, B. Life cycle analysis in refurbishment of the buildings as intervention practices in energy saving. *Energy Build.* **2015**, *86*, 74–85.
105. Pajchrowski, G.; Noskowiak, A.; Lewandowska, A.; Strykowski, W. Materials composition or energy characteristic – What is more important in environmental life cycle of buildings? *Build. Environ.* **2014**, *72*, 15–27.
106. Paleari, M.; Lavagna, M.; Campioli, A. The assessment of the relevance of building components and life phases for the environmental profile of nearly zero-energy buildings: Life cycle assessment of a multifamily building in Italy. *Int. J. Life Cycle Assess.* **2016**, *21*, 1667–1690.
107. Pargana, N.; Pinheiro, M.D.; Silvestre, J.D.; de Brito, J. Comparative environmental life cycle assessment of thermal insulation materials of buildings. *Energy Build.* **2014**, *82*, 466–481.
108. Peuportier, B.L. Life cycle assessment applied to the comparative evaluation of single family houses in the French context. *Energy Build.* **2001**, *33*, 443–450.
109. Proietti, S.; Sdringola, P.; Desideri, U.; Zepparelli, F.; Masciarelli, F.; Castellani, F. Life Cycle Assessment of a passive house in a seismic temperate zone. *Energy Build.* **2013**, *64*, 463–472.
110. Rakhshan, K.; Friess, W.A.; Tajerzadeh, S. Evaluating the sustainability impact of improved building insulation: A case study in the Dubai residential built environment. *Build. Environ.* **2013**, *67*, 105–110.
111. Regulation (EU) No 305/2011 of the European Parliament and of the Council of 9 March 2011 Laying Down Harmonised Conditions for the Marketing of Construction Products and Repealing Council Directive 89/106/EEC Text with EEA Relevance. Available online: <https://eur-lex.europa.eu/legal-content/EN/TXT/?uri=CELEX%3A32011R0305> (accessed on 4 August 2018).
112. Rodrigues, C.; Freire, F. Adaptive reuse of buildings: Eco-efficiency assessment of retrofit strategies for alternative uses of an historic building. *J. Clean. Prod.* **2017**, *157*, 94–105.
113. Rodrigues, C.; Freire, F. Building retrofit addressing occupancy: An integrated cost and environmental life-cycle analysis. *Energy Build.* **2017**, *140*, 388–398.
114. Roux, C.; Schalbart, P.; Peuportier, B. Accounting for temporal variation of electricity production and consumption in the LCA of an energy-efficient house. *J. Clean. Prod.* **2016**, *113*, 532–540.
115. Royo, P.; Ferreira, V.J.; López-Sabirón, A.M.; Ferreira, G. Hybrid diagnosis to characterise the energy and environmental enhancement of photovoltaic modules using smart materials. *Energy* **2016**, *101*, 174–189.
116. Safaei, A.; Freire, F.; Henggeler Antunes, C. A life cycle multi-objective economic and environmental assessment of distributed generation in buildings. *Energy Convers. Manag.* **2015**, *97*, 420–427.
117. Sagani, A.; Mihelis, J.; Dedoussis, V. Techno-economic analysis and life-cycle environmental impacts of small-scale building-integrated PV systems in Greece. *Energy Build.* **2017**, *139*, 277–290.
118. Samani, P.; Mendes, A.; Leal, V.; Miranda Guedes, J.; Correia, N. A sustainability assessment of advanced materials for novel housing solutions. *Build. Environ.* **2015**, *92*, 182–191.
119. Sandin, G.; Peters, G.M.; Svanström, M. Life cycle assessment of construction materials: The influence of assumptions in end-of-life modelling. *Int. J. Life Cycle Assess.* **2014**, *19*, 723–731.

120. Saner, D.; Juraske, R.; Kübert, M.; Blum, P.; Hellweg, S.; Bayer, P. Is it only CO<sub>2</sub> that matters? A life cycle perspective on shallow geothermal systems. *Renew. Sustain. Energy Rev.* **2010**, *14*, 1798–1813.
121. Senga Kiessé, T.; Ventura, A.; van der Werf, H.M.G.; Cazaciu, B.; Idir, R. Introducing economic actors and their possibilities for action in LCA using sensitivity analysis: Application to hemp-based insulation products for building applications. *J. Clean. Prod.* **2017**, *142*, 3905–3916.
122. Sierra-Pérez, J.; Boschmonart-Rives, J.; Gabarrell, X. Environmental assessment of façade-building systems and thermal insulation materials for different climatic conditions. *J. Clean. Prod.* **2016**, *113*, 102–113.
123. Sierra-Pérez, J.; Boschmonart-Rives, J.; Dias, A.C.; Gabarrell, X. Environmental implications of the use of agglomerated cork as thermal insulation in buildings. *J. Clean. Prod.* **2016**, *126*, 97–107.
124. Silvestre, J.D.; De Brito, J.; Pinheiro, M.D. From the new European Standards to an environmental, energy and economic assessment of building assemblies from cradle-to-cradle (3E-C2C). *Energy Build.* **2013**, *64*, 199–208.
125. Sinha, R.; Lennartsson, M.; Frostell, B. Environmental footprint assessment of building structures: A comparative study. *Build. Environ.* **2016**, *104*, 162–171.
126. Soust-Verdaguer, B.; Llatas, C.; Garcia-Martinez, A. Simplification in life cycle assessment of single-family houses: A review of recent developments. *Build. Environ.* **2016**, *103*, 215–227.
127. Stazi, F.; Tomassoni, E.; Di Perna, C. Super-insulated wooden envelopes in Mediterranean climate: Summer overheating, thermal comfort optimization, environmental impact on an Italian case study. *Energy Build.* **2017**, *138*, 716–732.
128. Su, X.; Luo, Z.; Li, Y.; Huang, C. Life cycle inventory comparison of different building insulation materials and uncertainty analysis. *J. Clean. Prod.* **2016**, *112*, 275–281.
129. Takano, A.; Pal, S.; Kuittinen, M.; Winter, S. The effect of material selection on life cycle energy balance: A case study on a hypothetical building model in Finland. *Build. Environ.* **2015**, *89*, 192–202.
130. Tettey, U.Y.A.; Dadoo, A.; Gustavsson, L. Effects of different insulation materials on primary energy and CO<sub>2</sub> emission of a multi-storey residential building. *Energy Build.* **2014**, *82*, 369–377.
131. Thiers, S.; Peuportier, B. Energy and environmental assessment of two high energy performance residential buildings. *Build. Environ.* **2012**, *51*, 276–284.
132. Ylmén, P.; Berlin, J.; Mjörnell, K.; Arfvidsson, J. The importance of including secondary effects when defining the system boundary with life cycle perspective: Case study for design of an external wall. *J. Clean. Prod.* **2017**, *143*, 1105–1113.
133. Zabalza Bribián, I.; Valero Capilla, A.; Aranda Usón, A. Life cycle assessment of building materials: Comparative analysis of energy and environmental impacts and evaluation of the eco-efficiency improvement potential. *Build. Environ.* **2011**, *46*, 1133–1140.
134. Zhang, X.; Wang, F. Life-cycle assessment and control measures for carbon emissions of typical buildings in China. *Build. Environ.* **2015**, *86*, 89–97.
